# Supplementary material for: Evaluating the utility of the female-specific mitochondrial f-orf gene for population genetic, phylogeographic and systematic studies in freshwater mussels (Bivalvia: Unionida)
Source: PeerJ journal article supplement (doi:10.7717/peerj.5007), 2018-06-13

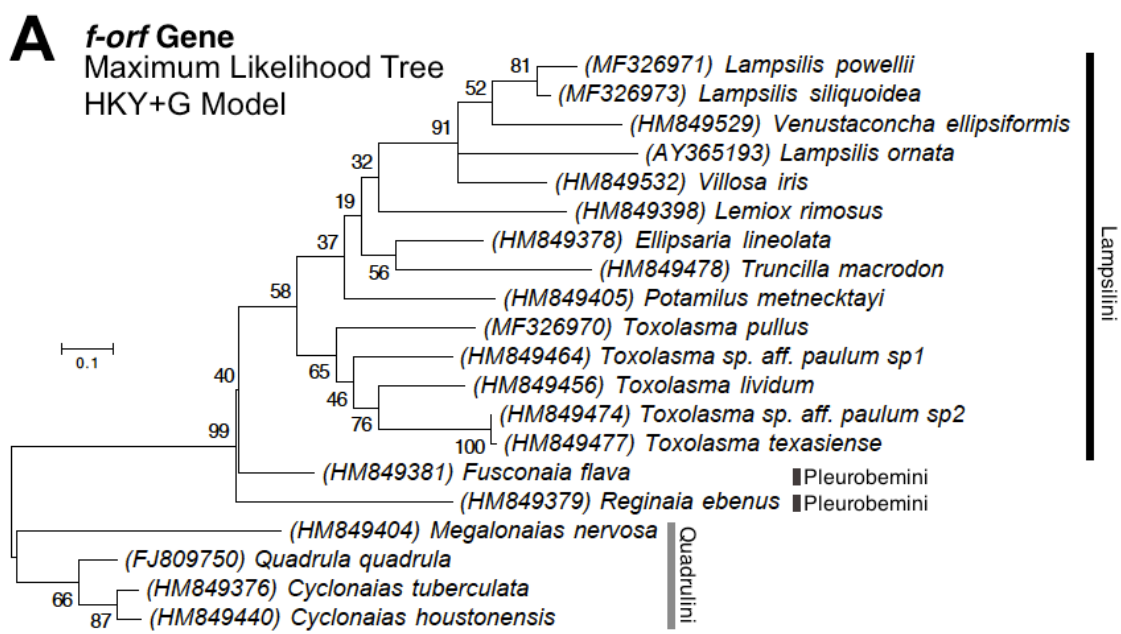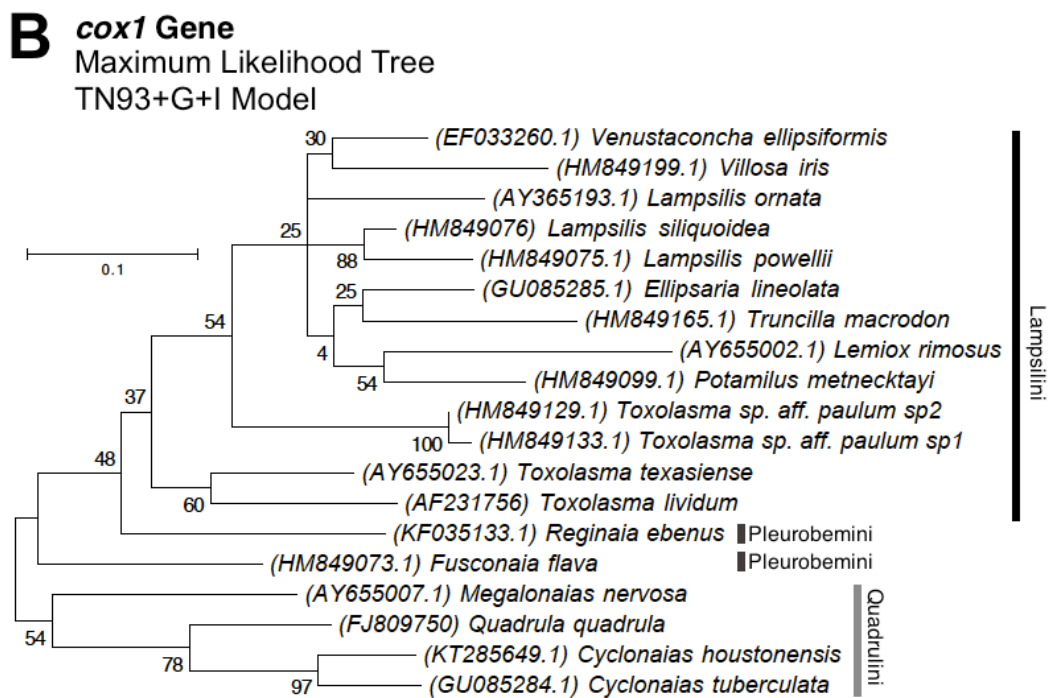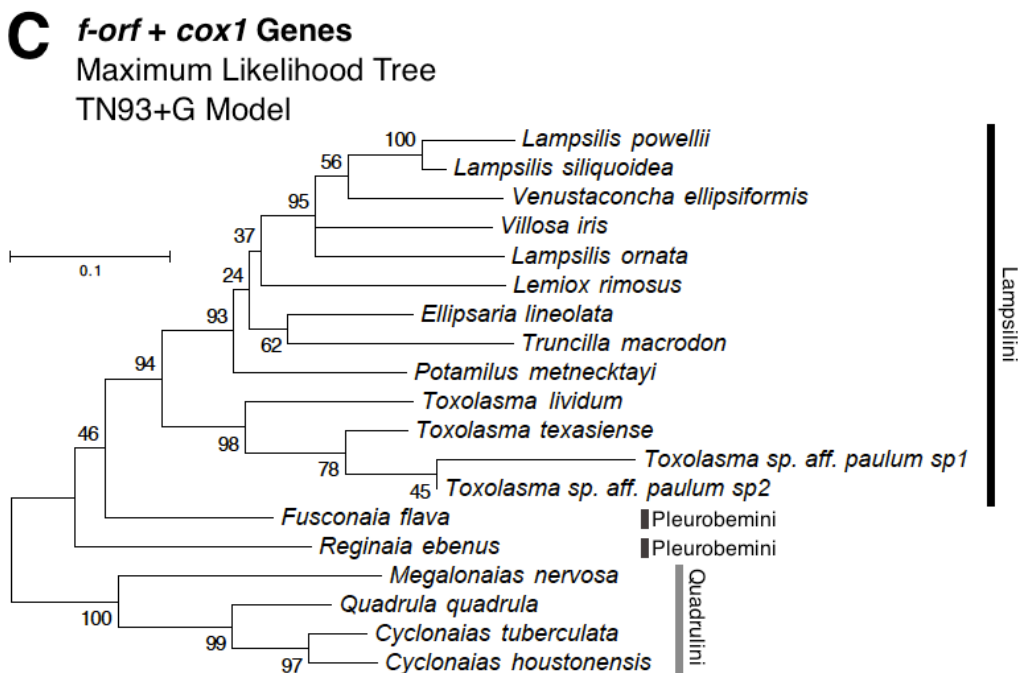

Supplement: FigureS2_-_italics.pdf [file FigureS2_-_italics.pdf]
